# Supplementary material for: Clinical experience of volumetric‐modulated flattening filter free stereotactic body radiation therapy of lesions in the lung with deep inspiration breath‐hold
Source: PubMed Central journal article supplement (PMC9512343; doi:10.1002/acm2.13733), 2022-07-22
Supplement: ACM2-23-e13733-s001.pdf [file ACM2-23-e13733-s001.pdf]

## SUPPLEMENTARY FILES

### Table

Clinical goals in stereotactic body radiotherapy, 15Gy x 3

| Structure          | Clinical Goal                          | Priority |
|--------------------|----------------------------------------|----------|
| PTV                | $D_{99\%} > 45.0 \text{ Gy}$           | High     |
|                    | $CI > 0.88 \text{ at } 45\text{Gy}$    | Low      |
| Spinal canal       | $D_{0.00\text{cc}} < 21,9 \text{ Gy}$  | High     |
|                    | $D_{1.20\text{cc}} < 12.3 \text{ Gy}$  | High     |
| Trachea            | $D_{0.00\text{cc}} < 30.0 \text{ Gy}$  | High     |
|                    | $D_{4.00\text{cc}} < 15.0 \text{ Gy}$  | High     |
| Bronchus main      | $D_{4.00\text{cc}} < 15.0 \text{ Gy}$  | High     |
|                    | $D_{0.00\text{cc}} < 30.0 \text{ Gy}$  | High     |
| Esophagus          | $D_{0.00\text{cc}} < 25,2 \text{ Gy}$  | Medium   |
|                    | $D_{5\text{cc}} < 17,7 \text{ Gy}$     | Medium   |
| Great vessel       | $D_{10,00\text{cc}} < 39.0 \text{ Gy}$ | Medium   |
|                    | $D_{0.00\text{cc}} < 45.0 \text{ Gy}$  | Medium   |
| Heart              | $D_{0.00\text{cc}} < 30.0 \text{ Gy}$  | Medium   |
|                    | $D_{15,00\text{cc}} < 24.0 \text{ Gy}$ | Medium   |
| Chest wall         | $V_{30\text{Gy}} < 30 \text{ cm}^3$    | Low      |
| Contralateral lung | $V_{4,50\text{Gy}} < 26 \%$            | Low      |

|          |                                                                                 |            |
|----------|---------------------------------------------------------------------------------|------------|
|          | $D_{\text{mean}} < 3.6$                                                         | Low        |
| External | $D_{2,00\text{cc}} < 63.0 \text{ Gy}$<br>$D_{0,00\text{cc}} < 67.5 \text{ Gy}$  | Low<br>Low |
| Ribs     | $D_{2,00\text{cc}} < 27 \text{ Gy}$<br>$D_{0,00\text{cc}} < 53.8 \text{ Gy}$    | Low<br>Low |
| Skin     | $D_{10,00\text{cc}} < 22.5 \text{ Gy}$<br>$D_{0,00\text{cc}} < 24.0 \text{ Gy}$ | Low<br>Low |

Abbreviations: CTV, clinical target volume; CI, Conformity index;  $D_{15\text{cc}}$ , maximum dose administered to a  $15\text{cm}^3$  volume;  $D_{5\text{cc}}$ , maximum dose administered to a  $5 \text{ cm}^3$  volume;  $D_{0,00\text{cc}}$ , maximum dose administered to a  $0,00\text{cm}^3$  volume;  $D_{1,20\text{cc}}$ , maximum dose administered to a  $1,20\text{cm}^3$  volume;  $D_{4,00\text{cc}}$ , maximum dose administered to a  $4,00\text{cm}^3$  volume;  $D_{5,00\text{cc}}$ , maximum dose administered to a  $5,00\text{cm}^3$  volume;  $D_{10,00\text{cc}}$ , maximum dose administered to a  $10,00\text{cm}^3$  volume;  $D_{15,00\text{cc}}$ , maximum dose administered to a  $15,00\text{cm}^3$  volume;  $D_{2\%}$ , maximum dose administered to 2% of volume;  $D_{99\%}$ , dose to 99% of the target volume;  $D_{\text{mean}}$ , mean dose, GTV, gross tumour volume; PTV, planning target volume;  $V_{20\text{Gy}}$ , organ volume receiving  $> 20 \text{ Gy}$ ;  $V_{30\text{Gy}}$ , organ volume receiving  $> 30 \text{ Gy}$ ;  $V_{4.5\text{Gy}}$ , organ volume receiving  $> 4.5 \text{ Gy}$ .
